# Supplementary material for: Gene Cloning, Expression and Characterization of a Novel Xylanase from the Marine Bacterium, Glaciecola mesophila KMM241
Source: MDPI journal article supplement (doi:10.3390/md11041173), 2013-04-08

## Supplementary Data

**Figure S1.** Lineweaver-Burk plots curves for the hydrolysis of beech wood xylan (**A**) and oat spelt xylan (**B**). The initial rates were determined with 1.0–15 g/L substrate at 35 °C. The data represent the mean of three experimental repeats with  $SD \leq 5\%$ .

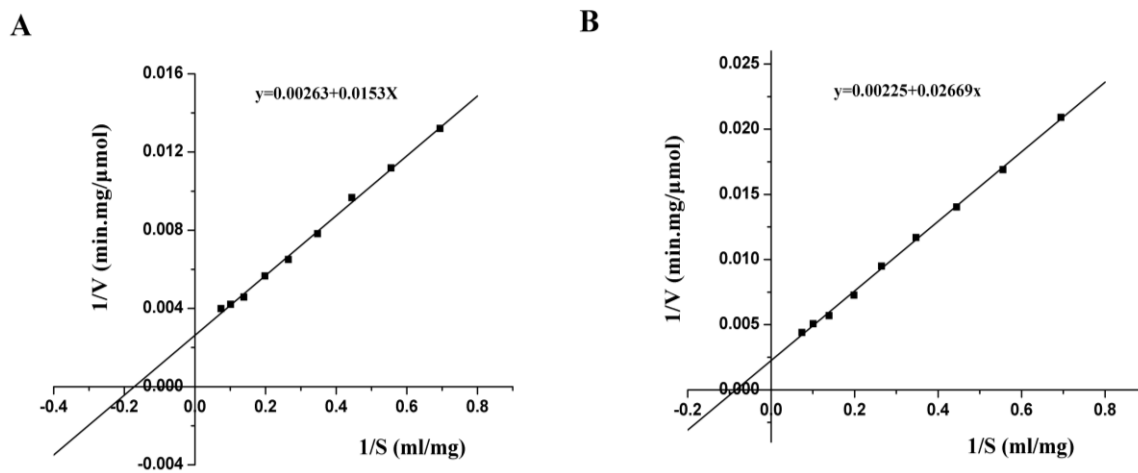

Supplement: s1 [file s1]
